# Supplementary material
Source: HighWire-hosted journal article supplement (https://www.cfp.ca/highwire/filestream/34668/field_highwire_adjunct_files/2/539_GHRYA_Resources_Page_2.pdf)
Supplement: 539_GHRYA_Resources_Page_2.pdf [file 539_GHRYA_Resources_Page_2.pdf]

Strength of Recommendations  
**Bold = Good**  
*Italics = Fair*  
 Plain Text = consensus or inconclusive evidence

**Strengths Questions (examples) to promote positive communication and to help build resiliency.**

What do you enjoy doing?  
 How would you describe yourself?  
 How would your best friend describe you?  
 What things are you proud of?  
 What are you good at?  
 What do others admire about you?  
 What is something someone said that made you feel really good about yourself?

Resources

[www.aap.org/en-us/professional-resources/Reaching-Teens/Documents/Private/SSHADESS\\_handout.pdf](http://www.aap.org/en-us/professional-resources/Reaching-Teens/Documents/Private/SSHADESS_handout.pdf)  
[www.modernmedicine.com/tag/theadsss-30-and-sshade](http://www.modernmedicine.com/tag/theadsss-30-and-sshade)  
[ebooks.aapublications.org/content/reaching-teens-strength-based-communication-strategies-to-build-resilience-and-support-healthy-adolescent-development](http://ebooks.aapublications.org/content/reaching-teens-strength-based-communication-strategies-to-build-resilience-and-support-healthy-adolescent-development)

**Quick Depression Screening**

Over the past two weeks, have you felt down, depressed, or hopeless?  
 Over the past two weeks, have you felt little interest or pleasure in doing things?

**PHQ-A Depression Screening**

In the past 2 weeks have you been bothered by any of the following problems:

|                                                                                                                                                                              | Not at all | Several Days | More than half the days | Nearly every day |
|------------------------------------------------------------------------------------------------------------------------------------------------------------------------------|------------|--------------|-------------------------|------------------|
| 1. Feeling down, depressed, irritable or hopeless?                                                                                                                           | 0          | 1            | 2                       | 3                |
| 2. Little interest or pleasure in doing things?                                                                                                                              | 0          | 1            | 2                       | 3                |
| 3. Trouble falling or staying asleep, or sleeping too much?                                                                                                                  | 0          | 1            | 2                       | 3                |
| 4. Feeling tired or having little energy?                                                                                                                                    | 0          | 1            | 2                       | 3                |
| 5. Poor appetite, weight loss or overeating?                                                                                                                                 | 0          | 1            | 2                       | 3                |
| 6. Feeling bad about yourself — or that you are a failure or have let yourself or your family down?                                                                          | 0          | 1            | 2                       | 3                |
| 7. Trouble concentrating on things like school work, reading, or watching TV?                                                                                                | 0          | 1            | 2                       | 3                |
| 8. Moving or speaking so slowly that other people could have noticed? Or the opposite — being so fidgety or restless that you have been moving around a lot more than usual? | 0          | 1            | 2                       | 3                |
| 9. Thoughts that you would be better off dead or of hurting yourself in some way. *                                                                                          | 0          | 1            | 2                       | 3                |
| <b>Total:</b>                                                                                                                                                                |            |              |                         |                  |

In the **past year** have you felt depressed or sad most days, even if you felt okay sometimes?  
 Yes  No

If you are experiencing any of the problems on this form, how difficult have these problems made it for you to do your work, take care of things at home, or get along with other people?

| Not difficult at all     | Somewhat difficult       | Very difficult           | Extremely Difficult      |
|--------------------------|--------------------------|--------------------------|--------------------------|
| <input type="checkbox"/> | <input type="checkbox"/> | <input type="checkbox"/> | <input type="checkbox"/> |

Has there been a time in the **past month** when you have had serious thoughts about ending your life?  
 Yes  No

Have you **EVER** in your WHOLE LIFE, tried to kill yourself or made a suicide attempt?  
 Yes  No

<http://www.phqscreeners.com/overview.aspx>

**PHQ-9 Depression Screening Explanation**

Scoring: 5-9 mild depression, 10 -14 moderate depression , 15 to 19 moderately severe depression, 20 and over severe depression

Additional questions are for a global impression but not for scoring

\*positive answers to question 9 require further evaluation

<http://www.phqscreeners.com/overview.aspx>

**Major Depressive Disorder, SSRIs and Young Adults**

*The use of SSRIs in young adults is associated with increased suicidal behaviours.*

SSRIs may be used when the benefit outweighs the risk and there is evaluation and close monitoring for adverse effects and suicidal ideation and behaviours.

**Quick Anxiety Screening GAD-2**

In the past 2 weeks have you been bothered by any of the following problems:

|                                               | Not at all | Several Days | More than half the days | Nearly every day |
|-----------------------------------------------|------------|--------------|-------------------------|------------------|
| 1. Feeling nervous, anxious or on edge        | 0          | 1            | 2                       | 3                |
| 2. Not being able to stop or control worrying | 0          | 1            | 2                       | 3                |
| <b>Positive score <math>\geq</math> 3</b>     |            |              |                         |                  |

Kroenke K, Spitzer RL, Williams JB, et al. Ann Intern Med. 2007;146(5):W77

**Patient Health Questionnaire – GAD-7 Anxiety Screening**

In the past 2 weeks have you been bothered by any of the following problems:

|                                                      | Not at all | Several Days | More than half the days | Nearly every day |
|------------------------------------------------------|------------|--------------|-------------------------|------------------|
| 1. Feeling nervous, anxious or on edge               | 0          | 1            | 2                       | 3                |
| 2. Not being able to stop or control worrying        | 0          | 1            | 2                       | 3                |
| 3. Worrying too much about different things          | 0          | 1            | 2                       | 3                |
| 4. Trouble relaxing                                  | 0          | 1            | 2                       | 3                |
| 5. Being so restless that it is hard to sit still    | 0          | 1            | 2                       | 3                |
| 6. Becoming easily annoyed or irritable              | 0          | 1            | 2                       | 3                |
| 7. Feeling afraid as if something awful might happen | 0          | 1            | 2                       | 3                |
| <b>Total:</b>                                        |            |              |                         |                  |

<http://www.phqscreeners.com/overview.aspx> Available in many languages

**GAD-7 Anxiety Screening Explanation**

Scoring: 5-9 mild anxiety, 10 -14 moderate anxiety , 15 and over – severe anxiety

Further evaluation recommended for a score of 10 or greater

<http://www.phqscreeners.com/overview.aspx>

**Mental Health Resources**

[www.ementalhealth.ca/](http://www.ementalhealth.ca/)  
[www.camh.ca/en/hospital/health\\_information/suicideprevention.ca/](http://www.camh.ca/en/hospital/health_information/suicideprevention.ca/)  
[www.gaincc.org/GAINSS](http://www.gaincc.org/GAINSS) a short screener for many mental health and psychosocial issues  
[www.caddra.ca/patient-forms/adults](http://www.caddra.ca/patient-forms/adults) Adult ADHD screening

**Risk Factors for young adult suicide**

History of previous suicide attempts and self-harm  
 Family history of suicide  
 Family violence  
 History of serious physical or mental illness  
 Alcohol or drug abuse, including prescription medications  
 Stressful life event or loss, eg death of a loved one, unemployment  
 Major life changes or transitions  
 Feelings of social isolation or lack of support network, including public humiliation or identifying as a minority  
 ADHD, impulsivity  
 Easy access to lethal methods including firearms

**Suicide Prevention -Crisis Centres**

[suicideprevention.ca/thinking-about-suicide/find-a-crisis-centre/](http://suicideprevention.ca/thinking-about-suicide/find-a-crisis-centre/)  
[suicideprevention.ca/francais/](http://suicideprevention.ca/francais/)

**Poverty Assessment Tool**

<https://thewellhealth.ca/poverty>

Copyright A. Greig 2018  
**Disclaimer:** Given the evolving nature of evidence and changing recommendations, the Greig Health Record is meant to be used as a guide only. Preventive care is delivered both episodically and at dedicated visits. This tool may be used in part or as a whole.
